# Supplementary material
Source: Springer Nature journal article supplement (https://www.springermedizin.de/resource/supplementary/12890_2013_452_MOESM2_ESM.pdf/9505250)
Supplement: MOESM2 [file 9505250]

**A****Kaplan-Meier survival estimates**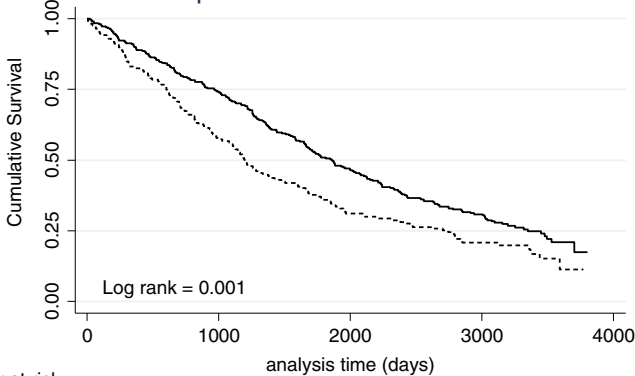

Number at risk

|         | 0   | 1000 | 2000 | 3000 | 4000 |
|---------|-----|------|------|------|------|
| < 75 %  | 322 | 237  | 148  | 75   | 0    |
| >= 75 % | 171 | 99   | 52   | 24   | 0    |

— < 75 % percentile      - - - - - >= 75 % percentile

**B****Kaplan-Meier survival estimates**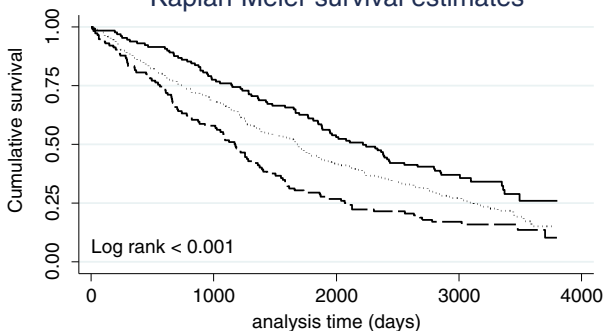

|                  | 0   | 1000 | 2000 | 3000 | 4000 |
|------------------|-----|------|------|------|------|
| Moderate COPD    | 129 | 100  | 67   | 27   | 0    |
| Severe COPD      | 250 | 170  | 103  | 57   | 0    |
| Very severe COPD | 114 | 66   | 30   | 15   | 0    |

— Moderate COPD      ..... Severe COPD  
 - - - - - Very Severe COPD

**C****Kaplan-Meier survival estimates**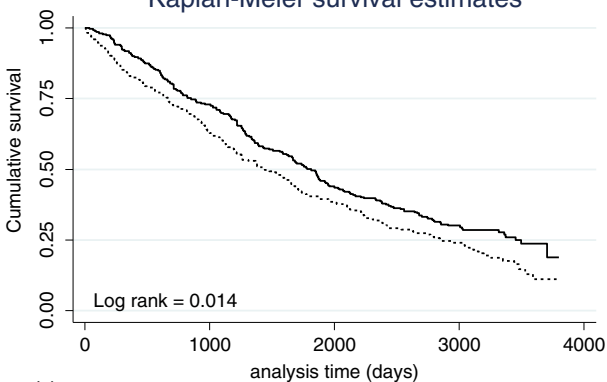

|                  | 0   | 1000 | 2000 | 3000 | 4000 |
|------------------|-----|------|------|------|------|
| <= 40 pack years | 270 | 196  | 115  | 58   | 0    |
| > 40 pack years  | 223 | 140  | 85   | 41   | 0    |

— Packyears <= 40      ..... Packyears > 40
